# Supplementary material for: Perimidine based selective colorimetric and fluorescent turn-off chemosensor of aqueous Cu2+: studies on its antioxidant property along with its interaction with calf thymus-DNA
Source: Royal Society of Chemistry journal article supplement (doi:10.1039/c7ra06687b), 2017-01-01
Supplement: c7ra06687b1.pdf [file c7ra06687b1.pdf]

## Perimidine based selective colorimetric and fluorescent turn-off chemosensor of aqueous Cu<sup>2+</sup>: Studies on its antioxidant property alongwith its interaction with calf thymus-DNA

Debashis Roy<sup>a</sup>, Arijit Chakraborty<sup>b,\*</sup>, Rina Ghosh<sup>a,\*</sup>

<sup>a</sup> Department of Chemistry, Jadavpur University, Kolkata 700032, India.

<sup>b</sup> Department of Chemistry, Acharya B. N. Seal College, Cooch Behar, West Bengal 736101, India.

E-mails of the authors: roy.debashis89@gmail.com (D. Roy), arijit\_chak2002@yahoo.com (A. Chakraborty), ghoshrina@yahoo.com (R. Ghosh).

\*represents Corresponding authors.

| No. | Content                                                                | Page No. |
|-----|------------------------------------------------------------------------|----------|
| 1   | <sup>1</sup> H NMR (DMSO-d <sub>6</sub> , 300 MHz) spectra of <b>1</b> | 2        |
| 2   | <sup>13</sup> C NMR (DMSO-d <sub>6</sub> , 75 MHz) spectra of <b>1</b> | 2        |
| 3   | FT-IR spectra of <b>1</b>                                              | 3        |
| 4   | HRMS spectra of <b>1</b>                                               | 3        |
| 5   | Determination of Quenching efficiency                                  | 4        |
| 6   | Determination of Binding constant                                      | 4        |
| 7   | Determination of Detection limits                                      | 5        |
| 8   | Life time measurement of <b>1</b> in presence of Cu <sup>2+</sup>      | 5        |
| 9   | Measurement of antioxidant activity                                    | 6        |
| 10  | Notes and References                                                   | 6        |

1.  $^1\text{H}$  NMR (DMSO- $d_6$ , 300 MHz) spectra of **1**:

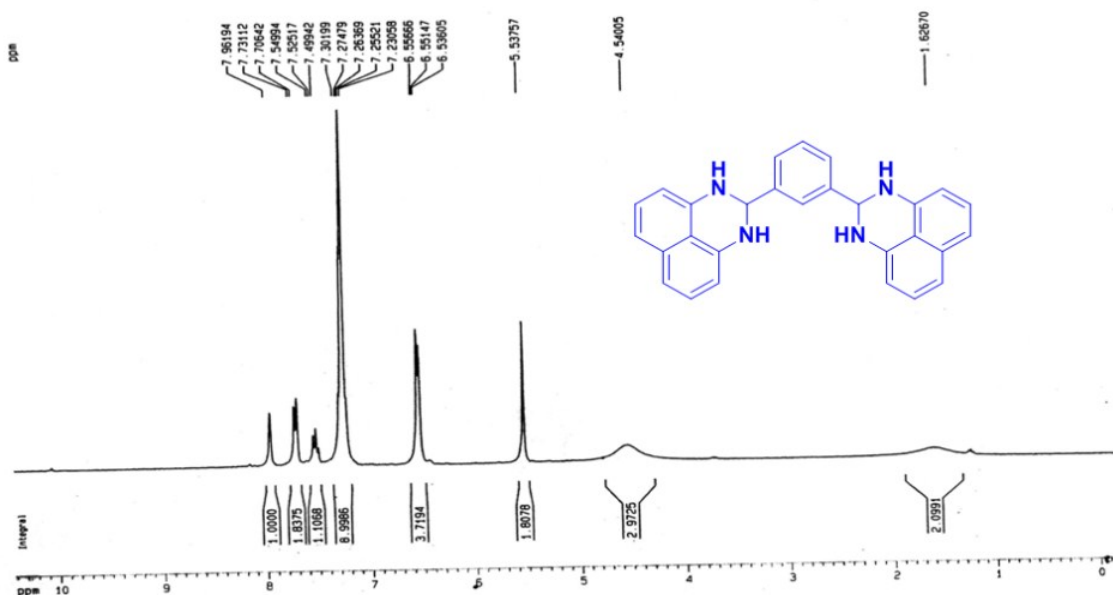

Fig. S1.  $^1\text{H}$  NMR spectra of **1**

2.  $^{13}\text{C}$  NMR (DMSO- $d_6$ , 75 MHz) spectra of **1**:

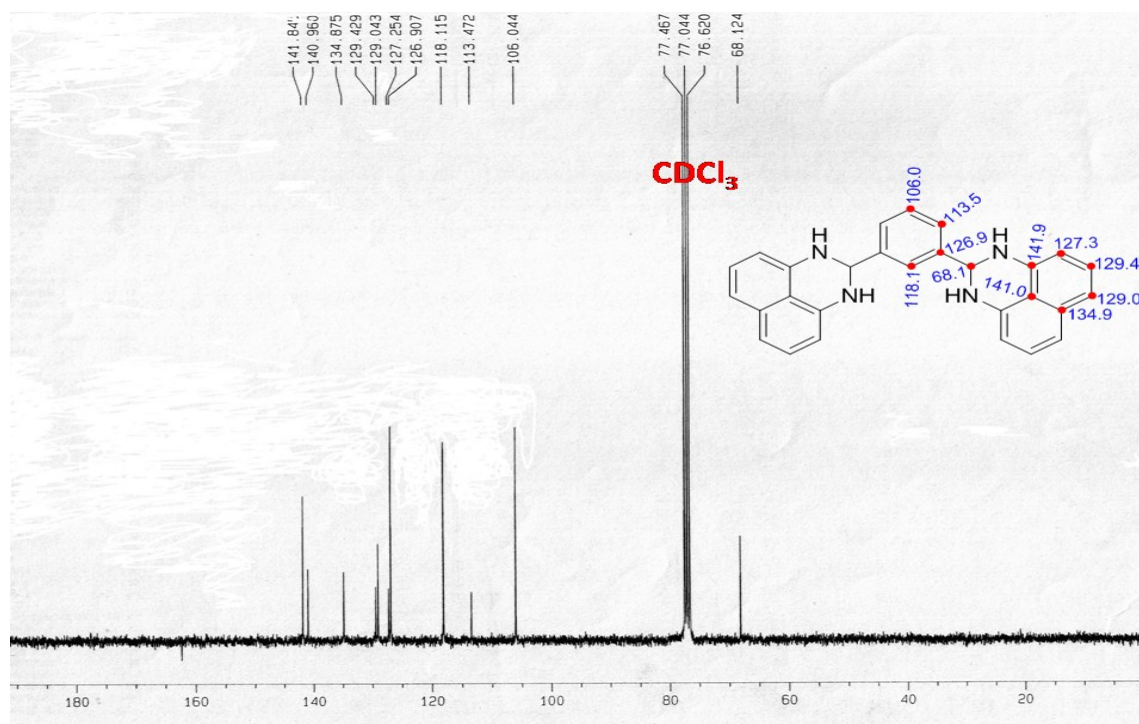

Fig. S2.  $^{13}\text{C}$  NMR spectra of **1**

### 3. FT-IR spectra of 1:

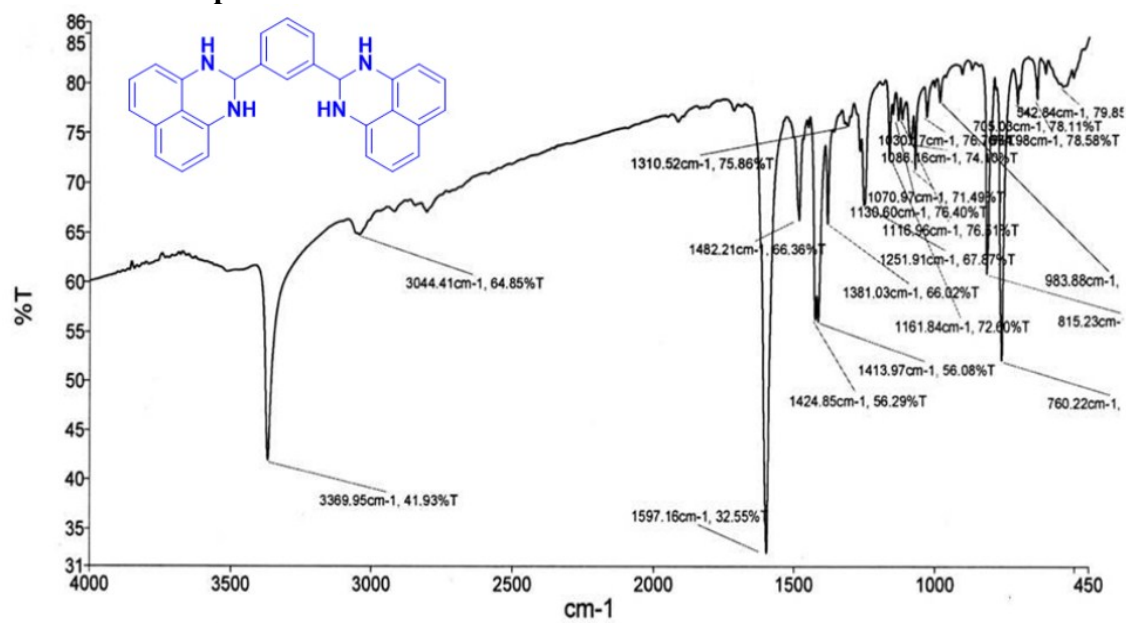

Fig. S3. FT-IR spectra of 1

### 4. HRMS spectra of 1:

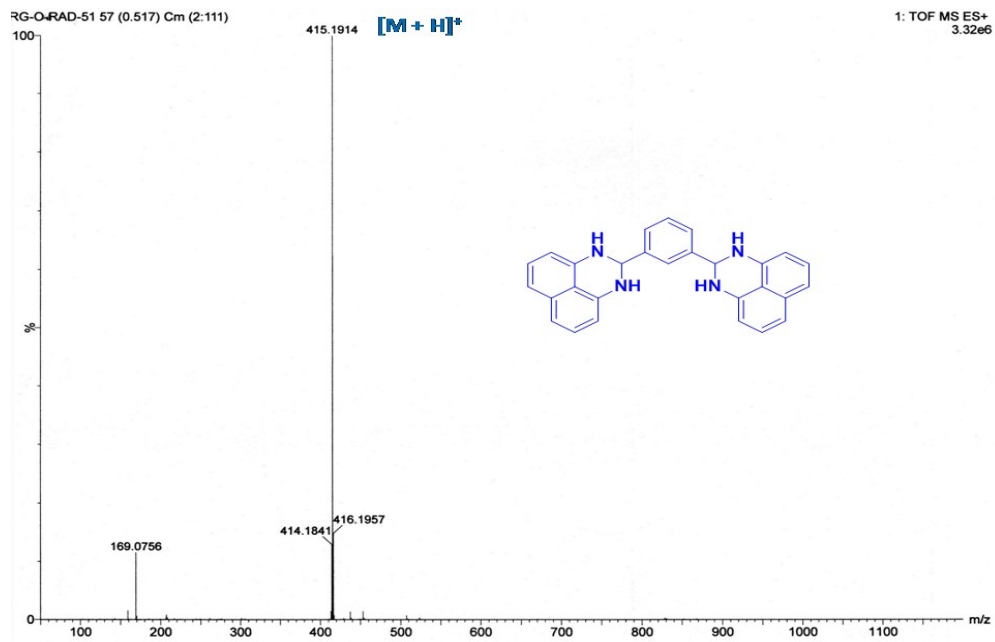

Fig. S4. High Resolution Mass Spectra of 1.

## 5. Determination of quenching efficiency <sup>1</sup>

$$\text{Quenching efficiency} = (I_0 - I_f)/I_0 \times 100$$

In this equation  $I_0$ ,  $I_f$  are the fluorescence intensities respectively, in the absence of and at the saturation of the interaction of analytes. Quenching efficiency of **1** for  $\text{Cu}^{2+}$  ion = 93%, and for CT-DNA quenching efficiency = 26%.

## 6. Determination of Binding constant

The binding constant of **1** toward  $\text{Cu}^{2+}$  ion is calculated using the Benesi–Hildebrand relation (eqn. 1).<sup>2</sup> According to this relation

$$\log \left( \frac{A - A_0}{A_f - A_0} \right) = \log [\text{Cu}^{2+}] + \log K_b \quad (1)$$

in which  $A_0$ ,  $A$  and  $A_f$  are the absorption values, in the absence of, at the intermediate and at the saturation of the interaction of  $\text{Cu}^{2+}$  ion respectively, and  $[\text{Cu}^{2+}]$  represents the concentration of aqueous  $\text{Cu}^{2+}$  ion added. The binding constant ( $K_b = 7.95 \times 10^7 \text{ M}^{-1}$ ) was determined by linear fitting of absorption titration curve (Fig. 5).

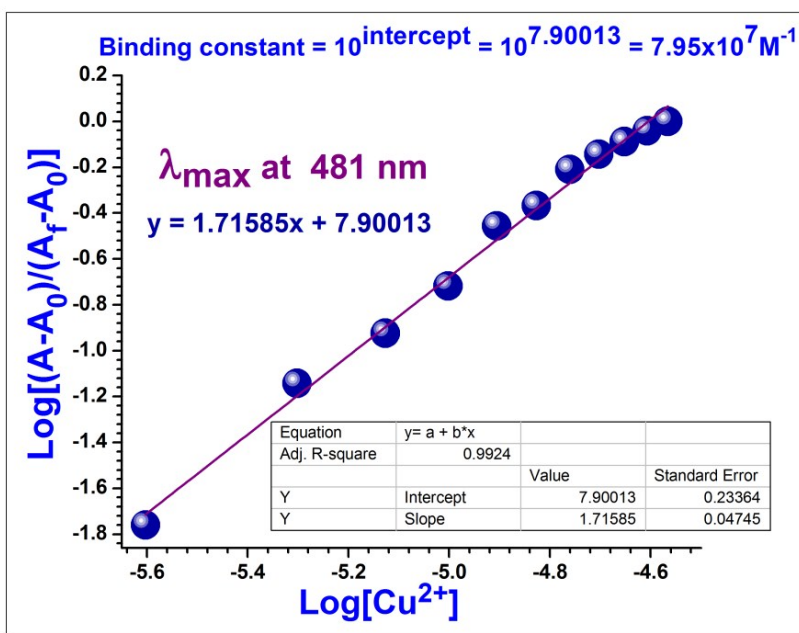

**Fig. S5.** Benesi–Hildebrand plots for determination of Binding constant of **1** for Cu<sup>2+</sup> ion.

### 7. Determination of Detection limits<sup>3</sup>

Detection limit (LOD) of **1** for Cu<sup>2+</sup> was determined using the equation  $LOD = 3\sigma / m$ , where  $\sigma$  = standard deviation of the blank (6.25  $\mu$ M solution of **1** in acetonitrile only, O.D at 481 nm), and  $m$  = slope of the curve obtained from titration of **1** with Cu<sup>2+</sup> (Fig. 6).

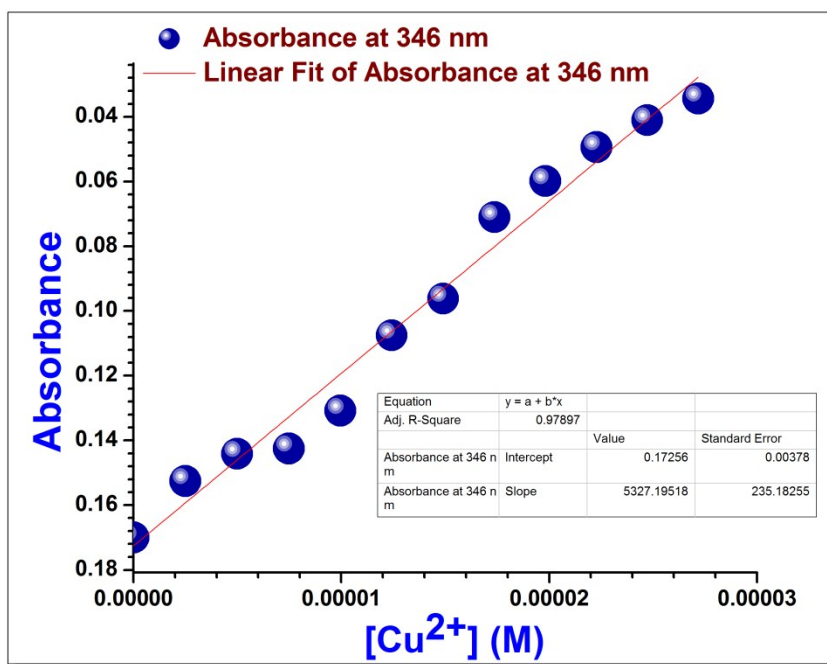

**Fig. S6.** Absorbance changes of **1** at 346 nm as a function of aqueous Cu<sup>2+</sup> ion concentration.

$\sigma = 0.00011$  (from experimental data) , and  $m = 5327.2$  (from graph, Fig. 6.). Using the formula, we got  $LOD = 3\sigma / m = 61.9 \times 10^{-9}$  (M).

### 8. Life time measurement of **1** in presence of Cu<sup>2+</sup> 4

We have calculated the radiative rate constant ( $k_r$ ) and the total non-radiative rate constant ( $k_{nr}$ ) of **1** and (**1**+ Cu<sup>2+</sup>) using the following equations:

$$\tau^{-1} = k_r + k_{nr} \quad (2)$$

$$k_r = \Phi / \tau \quad (3)$$

where  $\tau$ ,  $k_r$ ,  $k_{nr}$  and  $\Phi$  are the mean fluorescence lifetime, radiative rate constant and nonradiative rate constant, fluorescence quantum yield respectively.

**Table S1:** Time resolved fluorescence decay parameters of **1** in aqueous buffer in the presence of  $\text{Cu}^{2+}$  ion

| Solution               | $\tau_1$ (ns) | $a_1$   | $\tau_2$ (ns) | $a_2$   | $\tau_{\text{avg}}$<br>(ns) | $\chi^2$ | $\Phi$ | $k_r$ ( $\text{ns}^{-1}$ ) | $k_{nr}$ ( $\text{ns}^{-1}$ ) |
|------------------------|---------------|---------|---------------|---------|-----------------------------|----------|--------|----------------------------|-------------------------------|
| [1]                    | 0.91166       | -       | -             | -       | 0.91166                     | 1.06355  | 0.1    | 0.10969                    | 0.98717                       |
| [1] + $\text{Cu}^{2+}$ | 0.78001       | 0.75596 | 0.20166       | 0.24403 | 0.63887                     | 1.21665  | 0.0058 | 0.00908                    | 1.55619                       |

## 9. Measurement of antioxidant activity<sup>5</sup>

**Table S2:** Comparison of free radical scavenging activity between **1** and L-ascorbic acid by DPPH assay.

| Concentration ( $\mu\text{M}$ ) | Absorption of <b>1</b> at 517 nm | % inhibition by <b>1</b> | Absorption of L-ascorbic acid at 517 nm | % inhibition by L-ascorbic acid |
|---------------------------------|----------------------------------|--------------------------|-----------------------------------------|---------------------------------|
| 0                               | 0.55965                          | 0                        | 0.38838                                 | 0                               |
| 0.39063                         | 0.47757                          | 14.66631                 | 0.39449                                 | -1.5732                         |
| 0.78125                         | 0.55594                          | 0.66291                  | 0.36262                                 | 6.63268                         |
| 1.5625                          | 0.39317                          | 29.74716                 | 0.35971                                 | 7.38195                         |
| 3.125                           | 0.23264                          | 58.43116                 | 0.34942                                 | 10.03141                        |
| 6.25                            | 0.19167                          | 65.75181                 | 0.30559                                 | 21.31675                        |
| 12.5                            | 0.07977                          | 85.74645                 | 0.22929                                 | 40.96246                        |
| 25                              | 0.0189                           | 96.62289                 | 0.06611                                 | 82.97801                        |
| 50                              | 0.01581                          | 97.17502                 | 0.02857                                 | 92.6438                         |
| 100                             | 0.0318                           | 94.31788                 | 0.03229                                 | 91.68598                        |
|                                 | $\text{IC}_{50} = 2.3$           |                          | $\text{IC}_{50} = 13.9$                 |                                 |

## 10. Notes and References

1 R. M. Duke, E. B. Veale, F. M. Pfeffer, P. E. Kruger and T. Gunnlaugsson, Chem. Soc. Rev., 2010, **39**, 3936–3953.

2 M. Dong, T. H. Ma, A. J. Zhang, Y. M. Dong, Y. W. Wang and Y. Peng, *Dyes Pig.*, 2010, **87**, 164–172.

3 U. Rahman, A. Ali, S. K. Khalil, R. Guo, P. Zhang, H. Wang, Z. T. Li and D. W. Zhang, *Talanta*, 2017, **168**, 307-313.

4 A. B. Pradhan, S. K. Mandal, S. Banerjee, A. Mukherjee, S. Das, A. R. K. Bukhsh and A. Saha, *Polyhedron*, 2015, **94**, 75–82.

5 S. B. Kedare and R. P. Singh, *J. Food Sci. Technol.*, 2011, **48**, 412–422.
